# Supplementary material for: Genotyping of Two Mediterranean Trout Populations in Central-Southern Italy for Conservation Purposes Using a Rainbow-Trout-Derived SNP Array
Source: MDPI journal article supplement (doi:10.3390/ani11061803), 2021-06-17
Supplement: s1 [file s1]

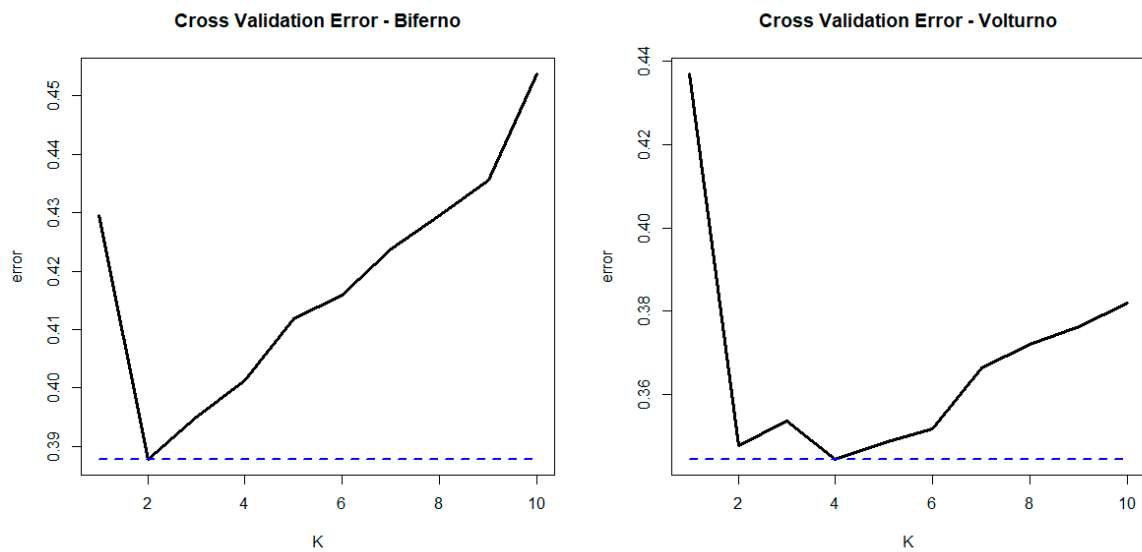

**Figure S1.** Plot of ADMIXTURE cross validation error from  $K = 1$  through  $K = 10$ . We chose  $K = 2$  and  $K = 4$  to analyze the SNP data in Biferno and Volturno rivers respectively, as values that minimize the error.

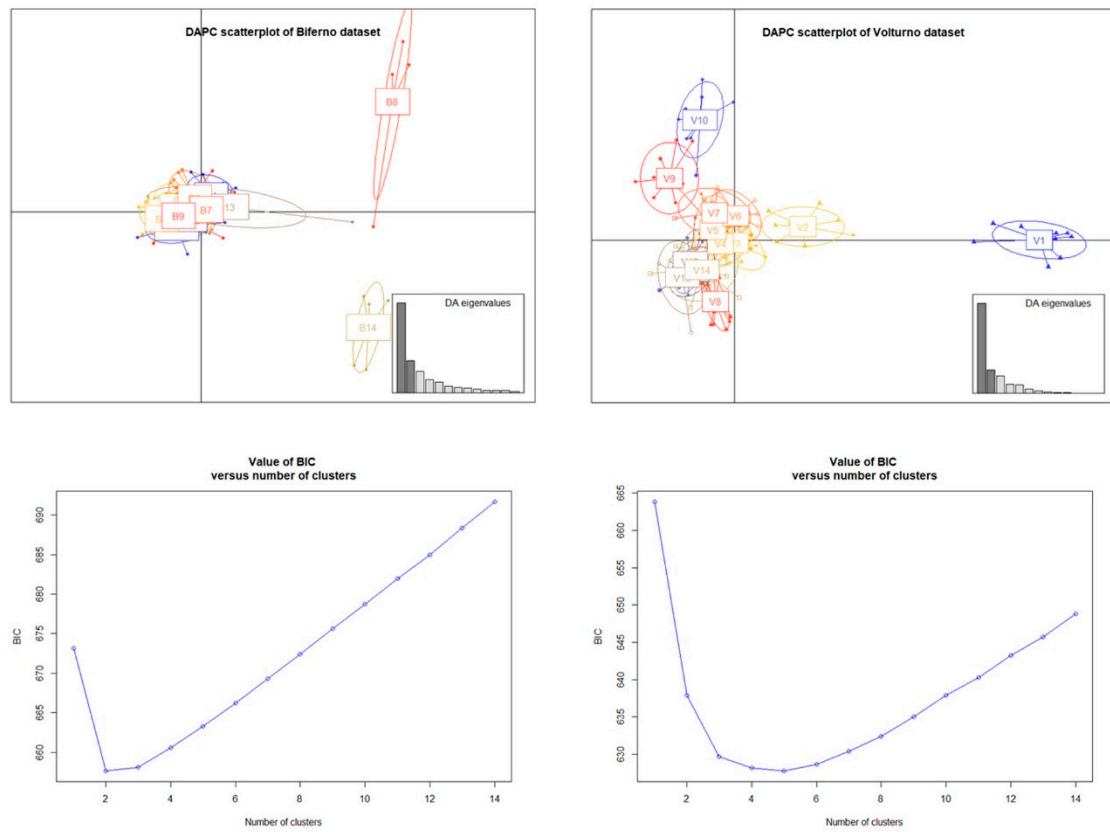

**Figure S2.** Discriminant analysis of principal component (DAPC) scatter plots of individuals using 871 and 828 SNP set for Biferno and Voltorno rivers, respectively. 20 PCs and 5 discriminant functions were retained during analyses to describe the relationship between the clusters. The bottom graphs illustrate the Bayesian Information Criterion (BIC) values for increasing values of cluster in the DAPC.

**Table S1.** Numbers (N) of brown trout specimens examined, river and sampling location coordinates. Population density, elevation and distance from source are also provided.

| River    | Location code | Lat.          | Long.         | N  | Population density<br>N/m <sup>2</sup> | Elevation<br>(m slm) | Distance from<br>source (m) |
|----------|---------------|---------------|---------------|----|----------------------------------------|----------------------|-----------------------------|
| Biferno  | B1            | 41°28'59.51"N | 14°27'58.24"E | 14 | 0.66                                   | 486                  | 0                           |
|          | B2            | 41°28'48.62"N | 14°28'41.63"E | 11 | 0.25                                   | 481                  | 0                           |
|          | B3            | 41°28'58.48"N | 14°28'59.44"E | 10 | 0.41                                   | 478                  | 700                         |
|          | B4            | 41°29'11.25"N | 14°30'21.97"E | 11 | 0.17                                   | 474                  | 3,300                       |
|          | B5            | 41°29'37.24"N | 14°29'2.17"E  | 15 | 0.16                                   | 479                  | 13,800                      |
|          | B6            | 41°31'49.62"N | 14°24'12.22"E | 12 | 0.27                                   | 525                  | 3,930                       |
|          | B7            | 41°32'52.65"N | 14°21'55.55"E | 6  | 0.23                                   | 575                  | 0                           |
|          | B8            | 41°30'12.54"N | 14°22'13.18"E | 5  | 0.03                                   | 636                  | -                           |
|          | B9            | 41°29'28.95"N | 14°31'18.80"E | 14 | 0.17                                   | 468                  | 6,600                       |
|          | B10           | 41°30'26.22"N | 14°31'51.76"E | 11 | 0.07                                   | 464                  | 8,000                       |
|          | B11           | 41°30'49.43"N | 14°31'42.93"E | 13 | 0.17                                   | 460                  | 9,100                       |
|          | B12           | 41°32'53.53"N | 14°31'44.06"E | 9  | 0.06                                   | 430                  | 13,700                      |
|          | B13           | 41°35'29.55"N | 14°34'7.38"E  | 7  | 0.02                                   | 388                  | 20,500                      |
|          | B14           | 41°24'33.39"N | 14°31'56.54"E | 6  | 0.01                                   | 861                  | -                           |
| Volturno | V1            | 41°38'21.4"N  | 14°04'43.0"E  | 10 | 0.21                                   | 552                  | 500                         |
|          | V2            | 41°39'23.9"N  | 14°04'43.9"E  | 9  | 0.04                                   | 515                  | 3,400                       |
|          | V3            | 41°38'04.2"N  | 14°06'09.3"E  | 7  | 0.01                                   | 383                  | 7,000                       |
|          | V4            | 41°37'00.1"N  | 14°05'51.7"E  | 10 | 0.01                                   | 345                  | 9,300                       |
|          | V5            | 41°36'50.2"N  | 14°05'53.3"E  | 8  | 0.01                                   | 341                  | -                           |
|          | V6            | 41°36'23.3"N  | 14°05'48.9"E  | 10 | 0.02                                   | 329                  | 10,500                      |
|          | V7            | 41°35'50.6"N  | 14°05'49.0"E  | 5  | 0.10                                   | 322                  | -                           |
|          | V8            | 41°34'46.0"N  | 14°07'35.0"E  | 14 | 0.01                                   | 270                  | 15,000                      |
|          | V9            | 41°34'40.3"N  | 14°12'42.3"E  | 10 | 0.01                                   | 322                  | -                           |
|          | V10           | 41°33'10.9"N  | 14°15'11.7"E  | 10 | -                                      | 478                  | -                           |
|          | V11           | 41°31'33.4"N  | 14°08'29.8"E  | 12 | 0.04                                   | 233                  | -                           |
|          | V12           | 41°31'20.5"N  | 14°08'42.4"E  | 11 | 0.28                                   | 222                  | -                           |
|          | V13           | 41°31'00.7"N  | 14°09'24.3"E  | 7  | 0.15                                   | 249                  | -                           |
|          | V14           | 41°31'8.43"N  | 14°8'16.41"E  | 21 | 0.03                                   | 218                  | 23,000                      |

**Table S2.** Analysis of Molecular Variance (AMOVA) applying the  $F_{ST}$  estimator of Weir and Cockerham variance component, calculated for 3 scenarios: all samples, samples only in Biferno, and only Volturno river. The results were significant at  $p$ -value < 0.001.

|                        | Among Populations     |                | Among individuals<br>within populations |                | Within individuals    |                |
|------------------------|-----------------------|----------------|-----------------------------------------|----------------|-----------------------|----------------|
|                        | Variance<br>component | %<br>variation | Variance<br>component                   | %<br>variation | Variance<br>component | %<br>variation |
| All samples            | 12.58                 | 12.15          | 9.90                                    | 9.55           | 81.10                 | 78.30          |
| Samples in<br>Biferno  | 7.93                  | 8.04           | -0.37                                   | -0.38          | 91.00                 | 92.34          |
| Samples in<br>Volturno | 10.35                 | 12.04          | 3.41                                    | 3.96           | 72.22                 | 84.00          |

**Table S3.** Frequency table with genotyping results at LDH and 16S loci for each sampling locations. Samples sites and codes are detailed in Table S1.

| River    | Locations | LDH     |        |       | 16S  |      |
|----------|-----------|---------|--------|-------|------|------|
|          |           | 100/100 | 100/90 | 90/90 | Med  | Atl  |
| Biferno  | B1        | 29%     | 64%    | 7%    | 64%  | 36%  |
|          | B2        | 27%     | 73%    | 0%    | 73%  | 27%  |
|          | B3        | 50%     | 40%    | 10%   | 90%  | 10%  |
|          | B4        | 27%     | 45%    | 27%   | 91%  | 9%   |
|          | B5        | 60%     | 40%    | 0%    | 80%  | 20%  |
|          | B6        | 75%     | 25%    | 0%    | 83%  | 17%  |
|          | B7        | 33%     | 50%    | 17%   | 100% | 0%   |
|          | B8        | 0%      | 0%     | 100%  | 0%   | 100% |
|          | B9        | 21%     | 64%    | 14%   | 79%  | 21%  |
|          | B10       | 45%     | 45%    | 9%    | 91%  | 9%   |
|          | B11       | 54%     | 46%    | 0%    | 77%  | 23%  |
|          | B12       | 89%     | 11%    | 0%    | 89%  | 11%  |
|          | B13       | 29%     | 57%    | 14%   | 86%  | 14%  |
|          | B14       | 0%      | 0%     | 100%  | 0%   | 100% |
| Volturno | V1        | 50%     | 50%    | 0%    | 100% | 0%   |
|          | V2        | 11%     | 33%    | 56%   | 33%  | 67%  |
|          | V3        | 57%     | 14%    | 29%   | 71%  | 29%  |
|          | V4        | 90%     | 10%    | 0%    | 90%  | 10%  |
|          | V5        | 50%     | 38%    | 13%   | 88%  | 13%  |
|          | V6        | 80%     | 10%    | 10%   | 80%  | 20%  |
|          | V7        | 60%     | 40%    | 0%    | 60%  | 40%  |
|          | V8        | 43%     | 57%    | 0%    | 100% | 0%   |
|          | V9        | 50%     | 40%    | 10%   | 80%  | 20%  |
|          | V10       | 40%     | 40%    | 20%   | 50%  | 50%  |
|          | V11       | 67%     | 25%    | 8%    | 92%  | 8%   |
|          | V12       | 91%     | 9%     | 0%    | 82%  | 18%  |
|          | V13       | 71%     | 29%    | 0%    | 43%  | 57%  |
|          | V14       | 86%     | 5%     | 10%   | 90%  | 10%  |
